# Supplementary material for: Novel cocrystals of the potent 1,2,4-thiadiazole-based neuroprotector with carboxylic acids: virtual screening, crystal structures and solubility performance
Source: Royal Society of Chemistry journal article supplement (doi:10.1039/d0nj05644h), 2021-01-01
Supplement: d0nj05644h1.pdf [file d0nj05644h1.pdf]

## Supporting Information

for publication

### Novel cocrystals of 1,2,4-thiadiazole-based potent neuroprotector with carboxylic acids: virtual screening, crystal structures and solubility performance

*Artem O. Surov<sup>a</sup>, Alexander P. Voronin<sup>a</sup>, Nikita A. Vasilev<sup>a</sup>, Andrey B. Ilyukhin<sup>b</sup>, German L.*

*Perlovich<sup>a\*</sup>*

<sup>a</sup>G.A. Krestov Institute of Solution Chemistry of the Russian Academy of Sciences, 1

Akademicheskaya St., 153045 Ivanovo, Russia;

<sup>b</sup>Institute of General and Inorganic Chemistry RAS, Leninsky Prosp. 31, 119991, Moscow,

Russia.

\*To whom correspondence should be addressed: Telephone: +7-4932-533784; Fax: +7-4932-336237; E-mail [glp@isc-ras.ru](mailto:glp@isc-ras.ru)

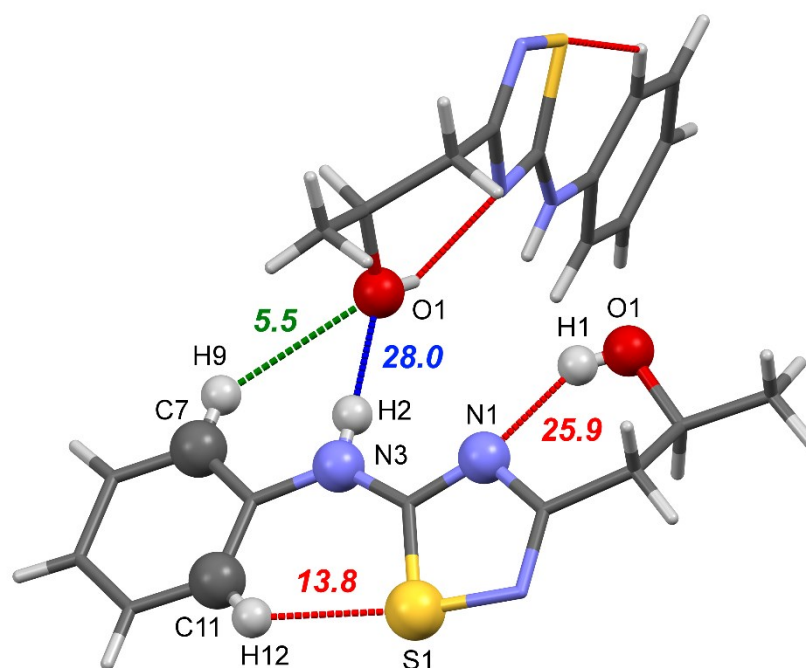

**Figure S1.** Part of hydrogen-bonded chain in the crystal of pure TDZH (refcode OQOZIF) with shown intramolecular (red dotted lines) and selected intermolecular interactions (blue and green dotted lines). Numbers indicate the energies of selected H-bonds estimated using QTAIMC in  $\text{kJ}\cdot\text{mol}^{-1}$ .

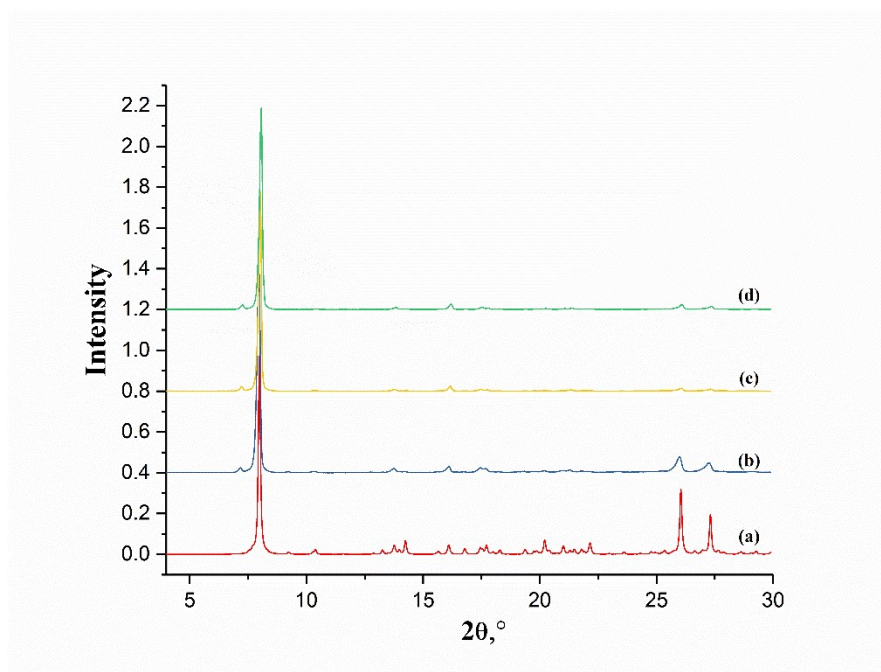

**Figure S2.** Calculated (a) and experimental PXRD patterns of [TDZH+VA] (1:1) obtained via mechanochemical treatment in the presence of methanol (b), acetonitrile (c) and acetonitrile/water mixture(d)

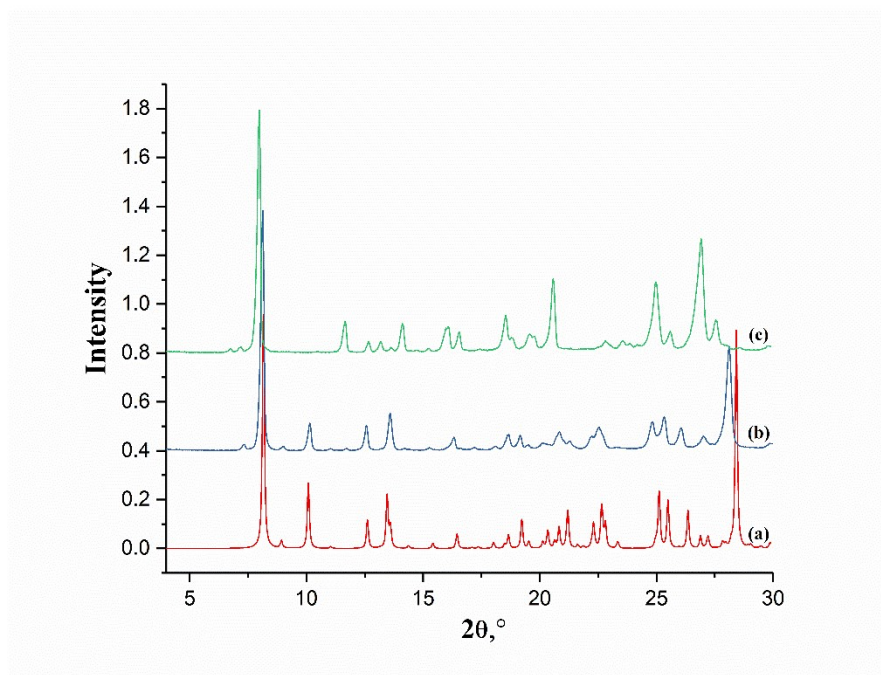

**Figure S3.** Calculated (a) and experimental PXRD patterns of [TDZH+GA+H<sub>2</sub>O] obtained via mechanochemical treatment in the presence of acetonitrile/water mixture(b) and neat acetonitrile (c)

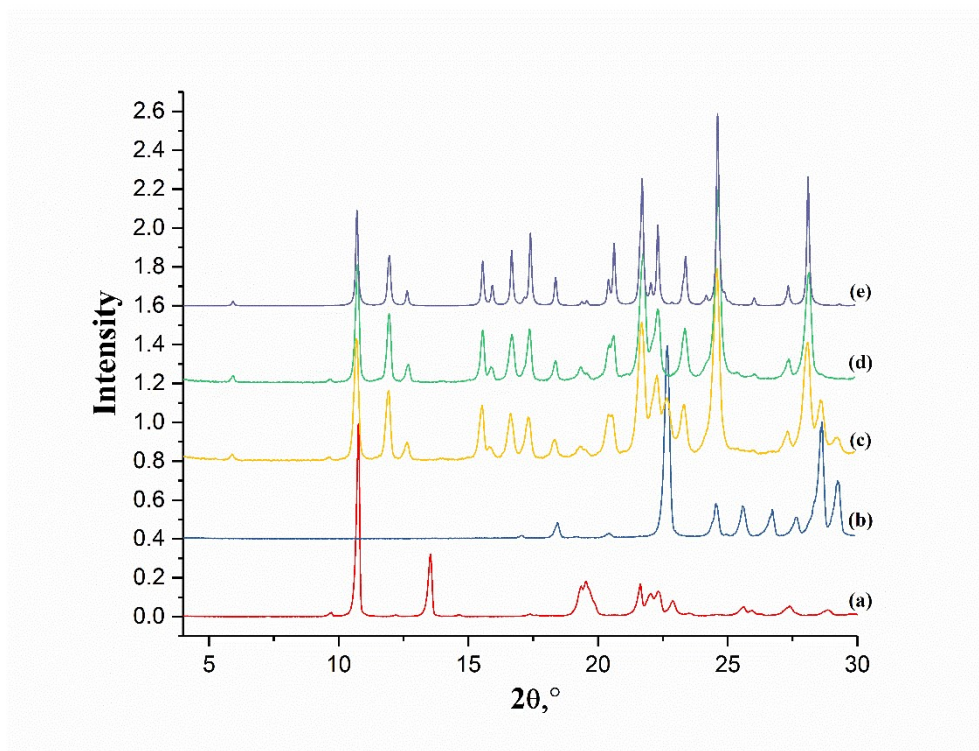

**Figure S4.** Results of PXRD analyses of parent TDZH (a), fumaric acid (b), product of mechanochemical treatment of TDZH and fumaric acid in a 1:1 molar ratio (c), product of mechanochemical treatment of TDZH and fumaric acid in a 2:1 molar ratio (d), calculated

PXRD patterns of the [TDZH+FumAc] (2:1) cocrystal (e).

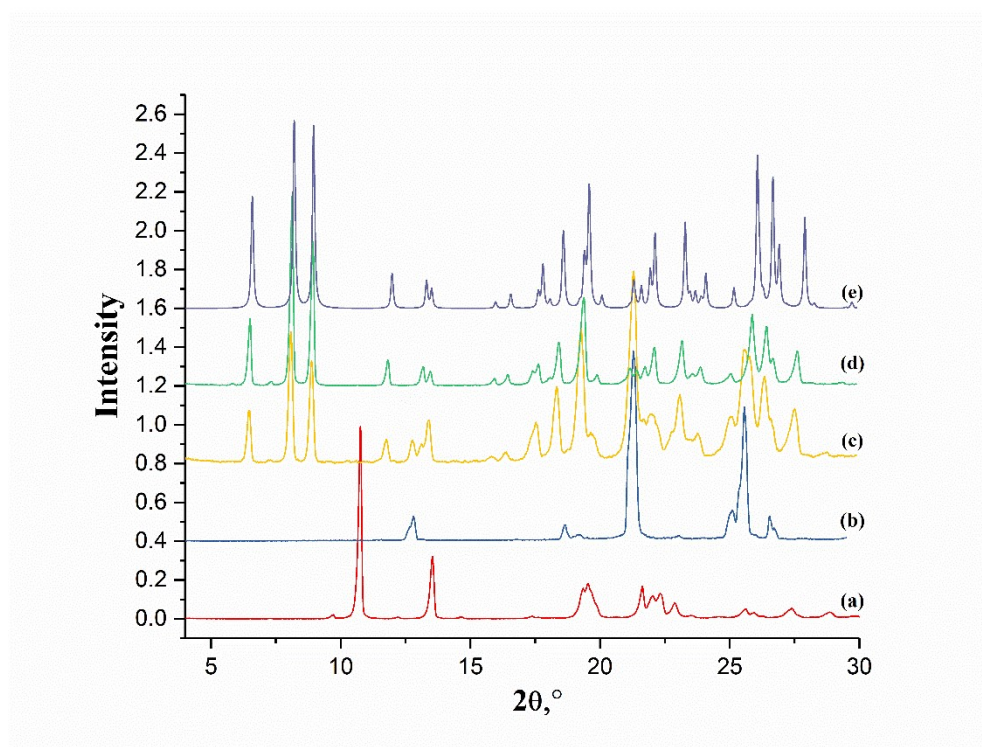

**Figure S5.** Results of PXRD analyses of parent **TDZH** (a), adipic acid (b), product of mechanochemical treatment of **TDZH** and adipic acid in a 1:1 molar ratio (c), product of mechanochemical treatment of **TDZH** and adipic acid in a 2:1 molar ratio (d), calculated PXRD patterns of the [TDZH+AdipAc] (2:1) cocrystal (e).

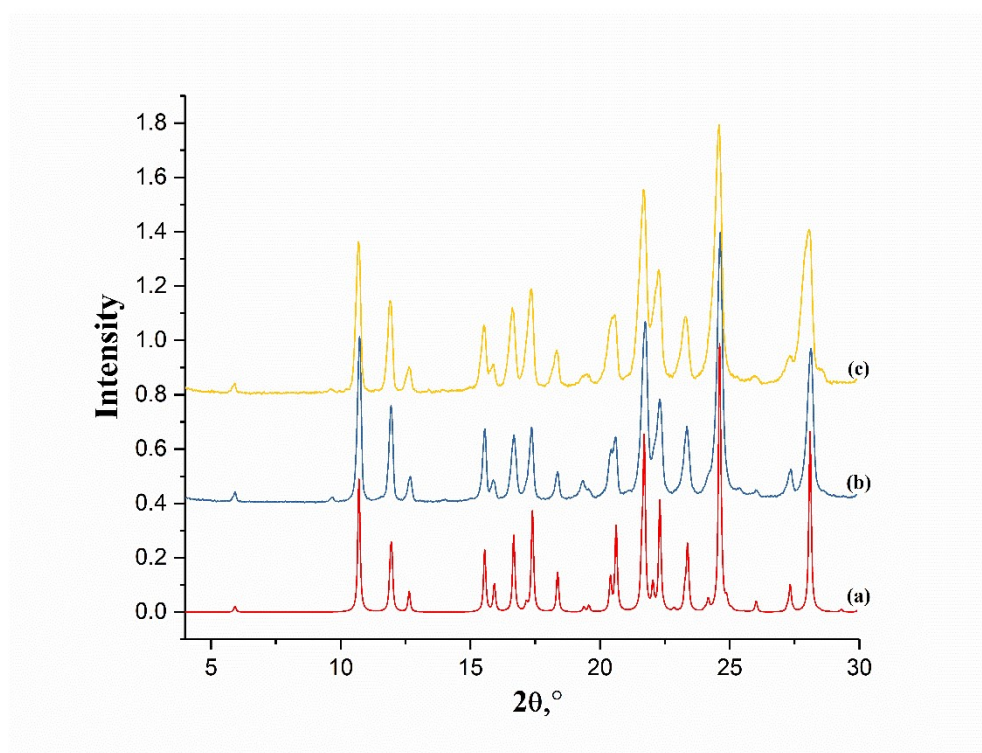

**Figure S6.** Calculated PXRD patterns of [TDZH+FumAc] (2:1) (a), experimental PXRD of product of mechanochemical treatment of TDZH with fumaric acid (b) and maleic acid (c) in a 2:1 molar ratio

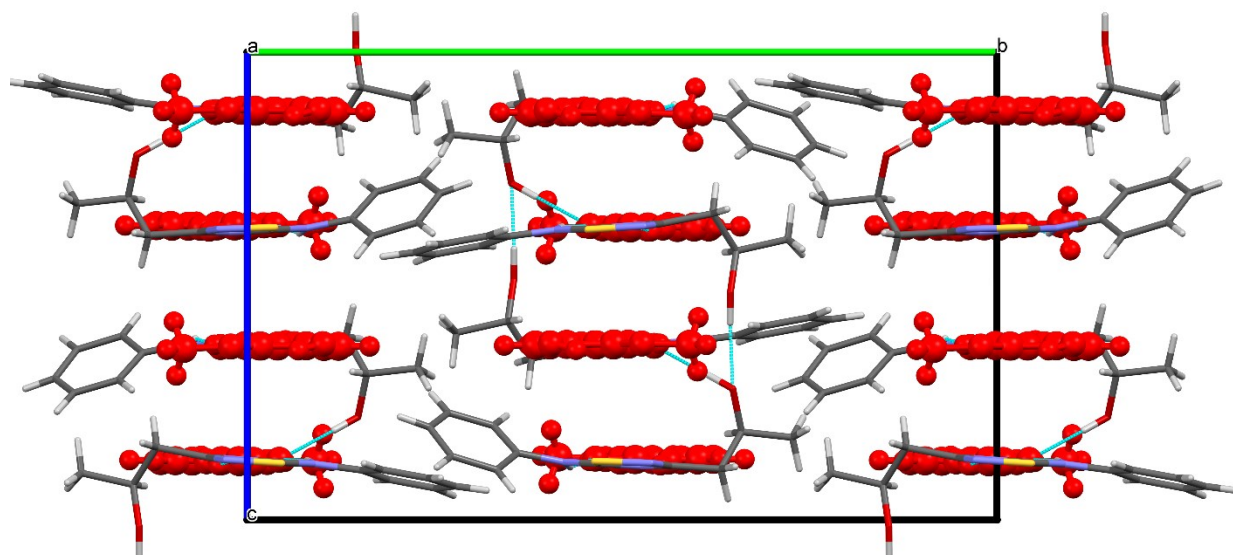

**Figure S7.** Packing projection of [TDZH+VA] (1:1) cocrystal along the *a* axis. Coformer molecules are shown in ball and stick and colored red.

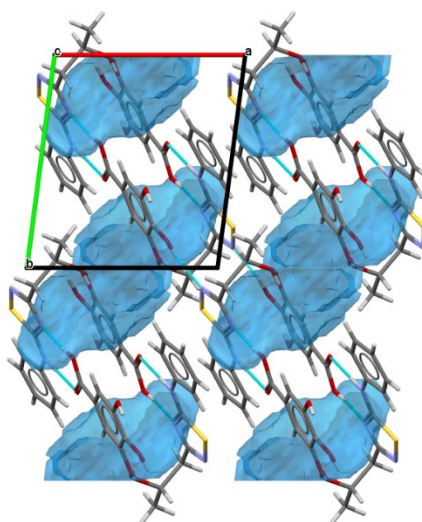

**Figure S8.** Packing arrangement and void maps in the crystal structures of the [TDZH+GA+H<sub>2</sub>O] (1:1:2.5) cocrystal.

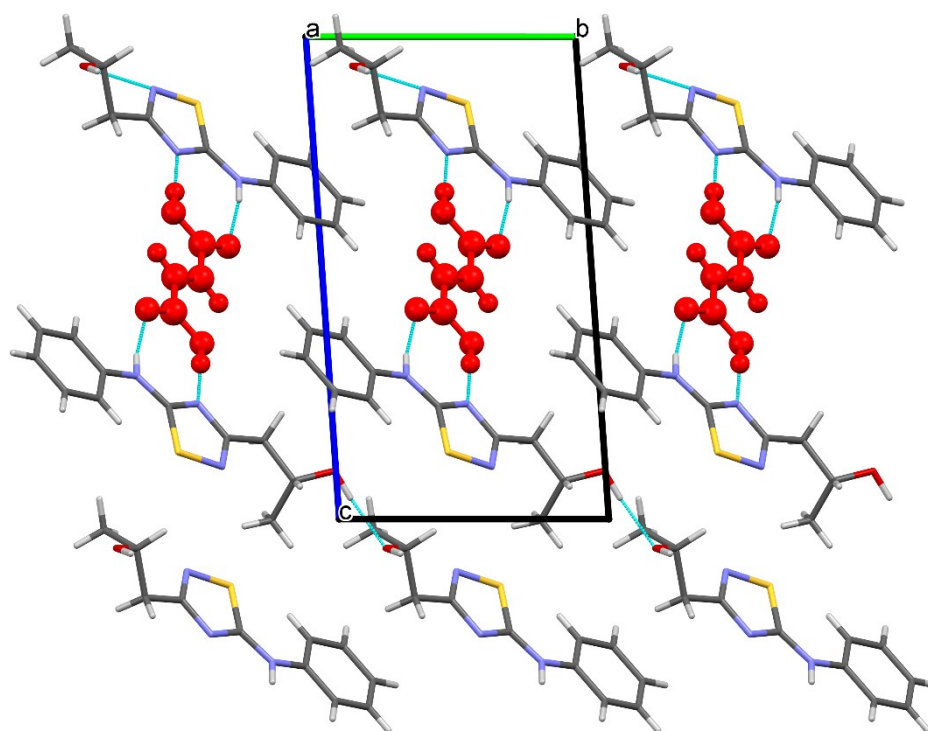

**Figure S9.** Packing projection of [TDZH+FumAc] (2:1) cocrystal along the *a* axis. Coformer molecules are shown in ball and stick and colored red.

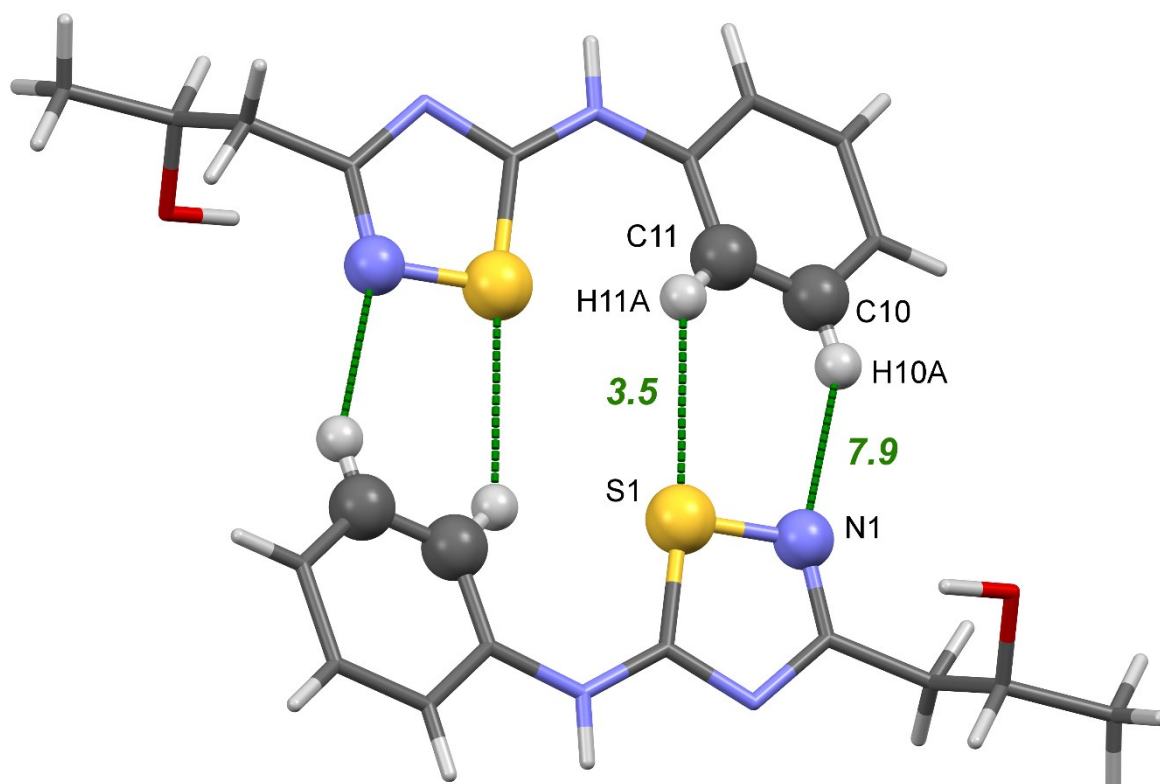

**Figure S10.** A centrosymmetric dimer of TDZH in the [TDZH+AdipAc] (2:1) crystal held by two non-conventional hydrogen bonds (shown as green dotted lines). Numbers indicate the energies of selected interactions estimated using QTAIMC in  $\text{kJ}\cdot\text{mol}^{-1}$ .

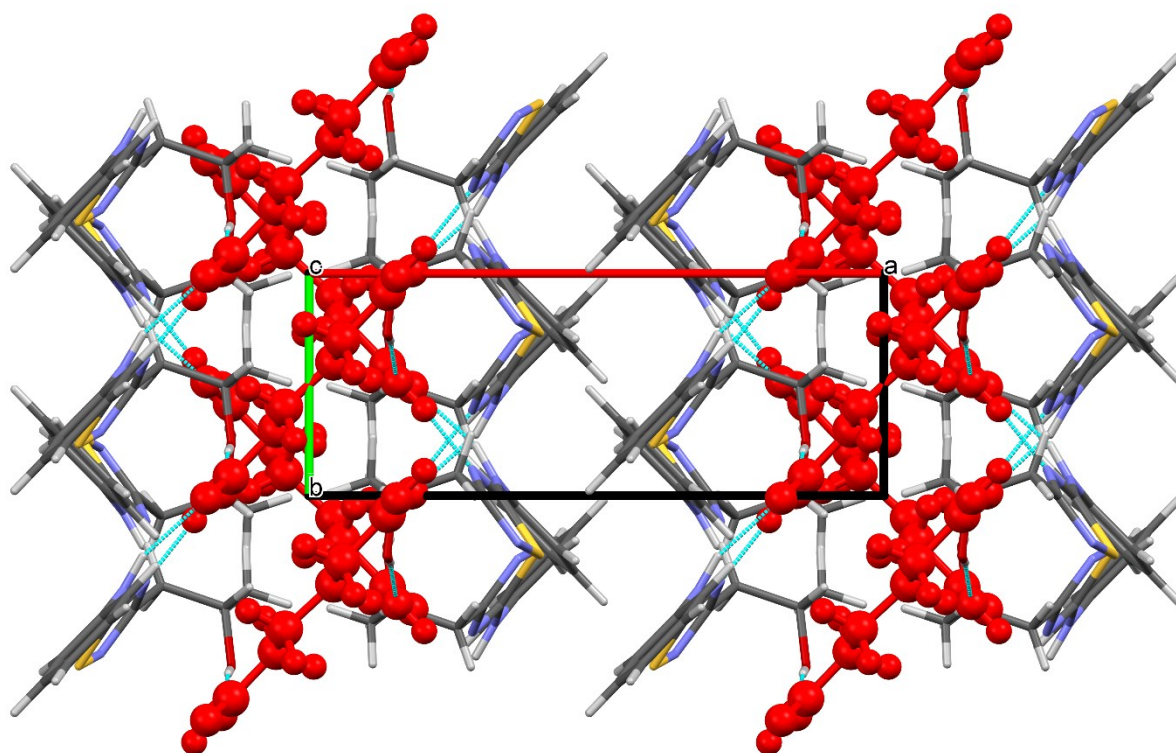

**Figure S11.** Packing projection of [TDZH+AdipAc] (2:1) cocrystal along the *c* axis. Coformer molecules are shown in ball and stick and colored red.

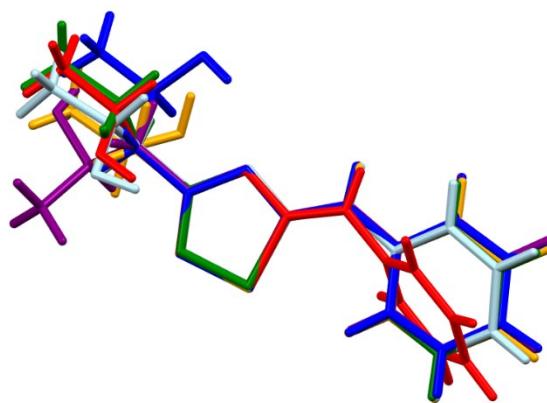

**Figure S12.** Overlay of TDZH conformations in crystals of parent TDZH (blue), [TDZH+FumAc] (2:1) (purple), [TDZH+GA+H<sub>2</sub>O] (1:1:2.5) (orange), [TDZH+AdipAc] (2:1) (light blue), [TDZH+VA] (1:1) (green), and [TDZH+OxalAc] (2:1) (red).

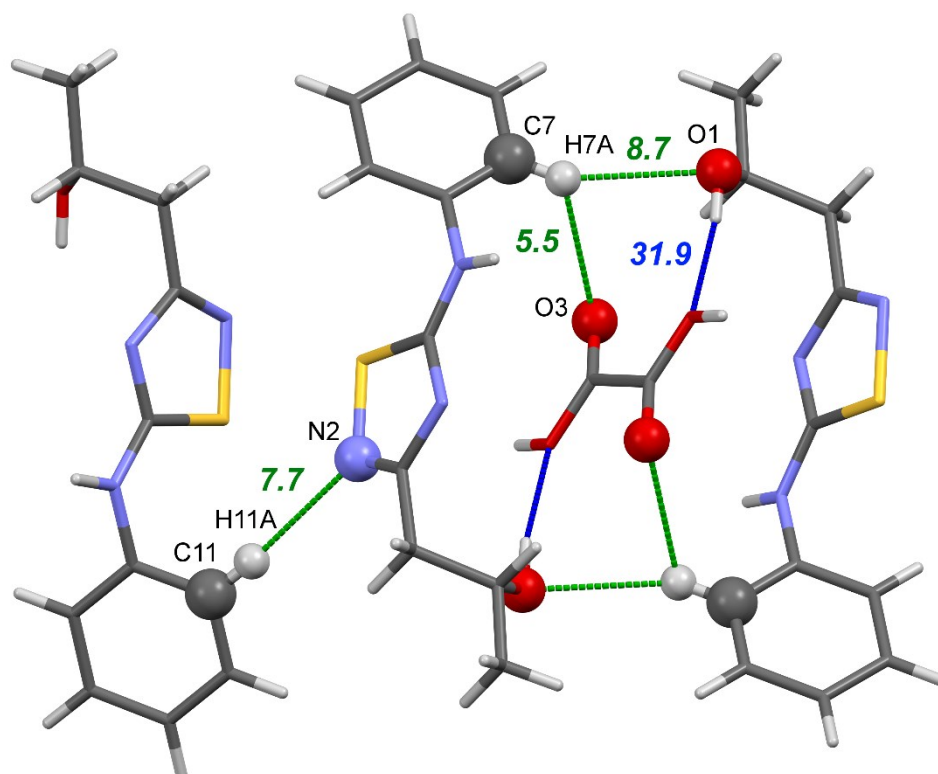

**Figure S13.** Part of crystal structure of [TDZH+OxalAc] (2:1) showing notable hydrogen bonds of phenyl C-H groups with nearby acceptors (green dotted lines) and side O-H...O bond between TDZH and OxalAc molecules (blue dotted line). Numbers indicate the energies of selected interactions estimated using QTAIMC in  $\text{kJ}\cdot\text{mol}^{-1}$ .

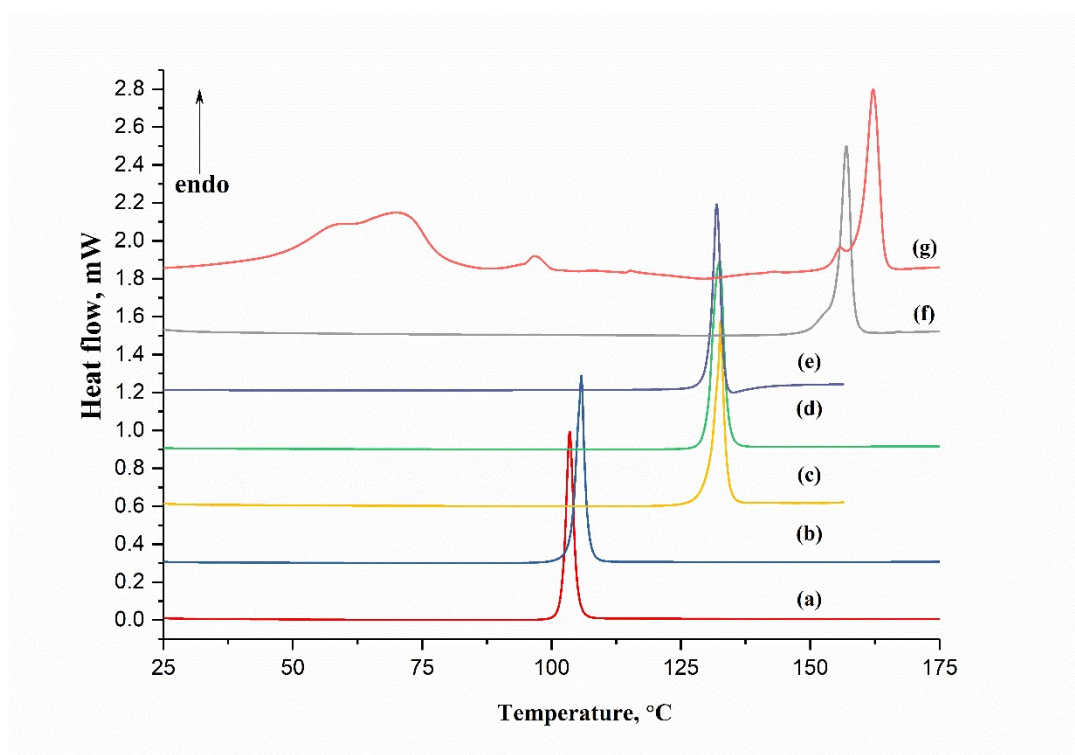

**Figure S14.** Experimental DSC curves of initial TDZH (a), [TDZH+AdipAc] (2:1) (b),

[TDZH+OxalAc] (2:1) (c), [TDZH+FumAc] (2:1) (d), [TDZH+VA] (1:1) (e), anhydrous [TDZH+GA] (1:1) (f) and [TDZH+GA+H<sub>2</sub>O] (1:1:2.5) (g)

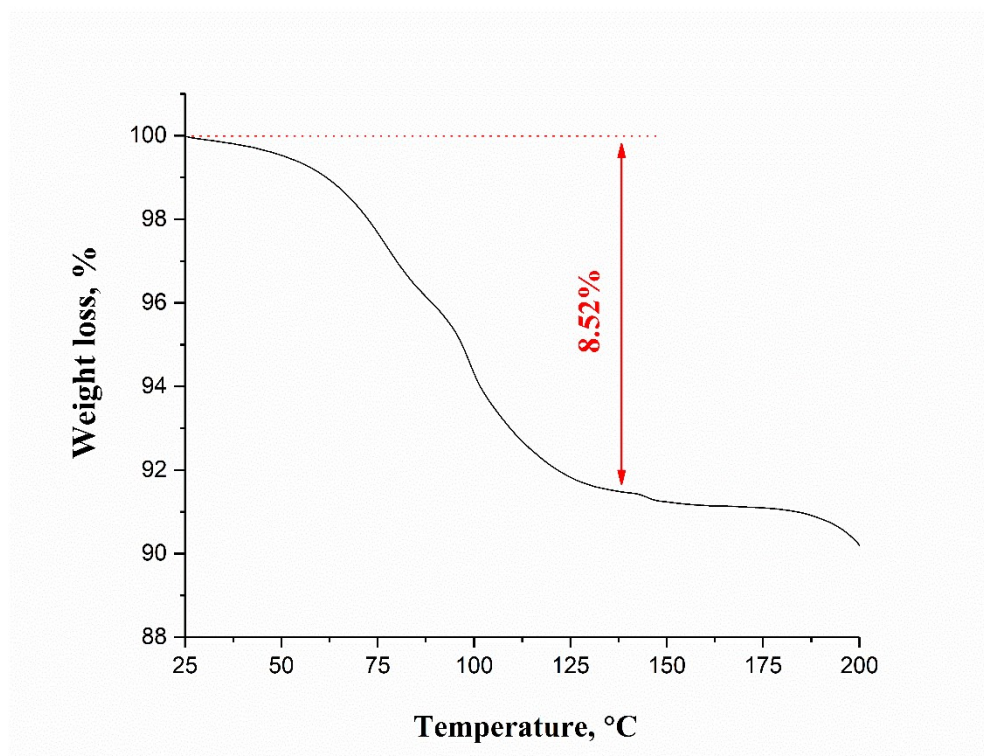

**Figure S15.** Results of TG analyses of [TDZH+GA+H<sub>2</sub>O] (1:1:2.5)

**Table S1.** Calculated change in interaction site pairing energies ( $\Delta E$  in  $\text{kJ}\cdot\text{mol}^{-1}$ ) for the TDZH+coformer systems assuming 1:1 molar ratio and results of experimental co-crystal screening

|                      | $\Delta E^a$ | $\Delta E_{\text{cr}}^b$ | Exp. outcome                                |
|----------------------|--------------|--------------------------|---------------------------------------------|
| <b>TDZH+OxalAc</b>   | -1.8         | -4.2                     | [ <b>TDZH+OxalAc</b> ] (2:1)                |
| <b>TDZH+FumAc</b>    | -1.4         | -0.2                     | [ <b>TDZH+FumAc</b> ] (2:1)                 |
| <b>TDZH+MaleicAc</b> | 5.1          | -                        | [ <b>TDZH+FumAc</b> ] (2:1)                 |
| <b>TDZH+AdipAc</b>   | -0.1         | -1.0                     | [ <b>TDZH+AdipAc</b> ] (2:1)                |
| <b>TDZH+VA</b>       | -1.0         | -2.9                     | [ <b>TDZH+VA</b> ] (1:1)                    |
| <b>TDZH+GA</b>       | -2.5         | -3.9                     | [ <b>TDZH+GA+H<sub>2</sub>O</b> ] (1:1:2.5) |

<sup>a</sup>Calculated according to procedure described in the 2.10 section of the Materials and Methods part using geometry optimized coformer molecules and a particular conformation of TDZH

<sup>b</sup>Calculated using the molecular conformations of TDZH and coformers extracted directly from the crystal structures of the obtained cocrystals

**Table S2.** Crystallographic data for multicomponent crystals of TDZH with carboxylic acids

|                                                                                                                   | [TDZH+VA]<br>(1:1)                                                                                 | [TDZH+GA+<br>H <sub>2</sub> O] (1:1:2.5)                                                                                  | [TDZH+OxAc]<br>(2:1)                                                                                     | [TDZH+AdipAc]<br>(2:1)                                                                                    | [TDZH+FumAc]<br>(2:1)                                                                                    |
|-------------------------------------------------------------------------------------------------------------------|----------------------------------------------------------------------------------------------------|---------------------------------------------------------------------------------------------------------------------------|----------------------------------------------------------------------------------------------------------|-----------------------------------------------------------------------------------------------------------|----------------------------------------------------------------------------------------------------------|
| <b>Crystal data</b>                                                                                               |                                                                                                    |                                                                                                                           |                                                                                                          |                                                                                                           |                                                                                                          |
| Chemical formula                                                                                                  | C <sub>11</sub> H <sub>13</sub> N <sub>3</sub> OS·<br>C <sub>8</sub> H <sub>8</sub> O <sub>4</sub> | C <sub>11</sub> H <sub>13</sub> N <sub>3</sub> OS·<br>C <sub>7</sub> H <sub>6</sub> O <sub>5</sub> ·2.5(H <sub>2</sub> O) | C <sub>11</sub> H <sub>13</sub> N <sub>3</sub> OS·<br>0.5(C <sub>2</sub> H <sub>2</sub> O <sub>4</sub> ) | C <sub>11</sub> H <sub>13</sub> N <sub>3</sub> OS·<br>0.5(C <sub>6</sub> H <sub>10</sub> O <sub>4</sub> ) | C <sub>11</sub> H <sub>13</sub> N <sub>3</sub> OS·<br>0.5(C <sub>4</sub> H <sub>4</sub> O <sub>4</sub> ) |
| <i>M<sub>r</sub></i>                                                                                              | 403.45                                                                                             | 450.46                                                                                                                    | 280.32                                                                                                   | 308.37                                                                                                    | 293.34                                                                                                   |
| Crystal system                                                                                                    | Monoclinic                                                                                         | Triclinic                                                                                                                 | Monoclinic                                                                                               | Monoclinic                                                                                                | Triclinic                                                                                                |
| Space group                                                                                                       | <i>P</i> 2 <sub>1</sub> / <i>n</i>                                                                 | <i>P</i> <sup>−</sup> 1                                                                                                   | <i>P</i> 2 <sub>1</sub> / <i>n</i>                                                                       | <i>P</i> 2 <sub>1</sub> / <i>c</i>                                                                        | <i>P</i> <sup>−</sup> 1                                                                                  |
| Temperature (K)                                                                                                   | 150                                                                                                | 150                                                                                                                       | 150                                                                                                      | 150                                                                                                       | 296                                                                                                      |
| <i>a</i> (Å)                                                                                                      | 13.4199(5)                                                                                         | 9.5188 (12)                                                                                                               | 14.3570 (19)                                                                                             | 13.770 (2)                                                                                                | 5.7508 (1)                                                                                               |
| <i>b</i> (Å)                                                                                                      | 21.9195(10)                                                                                        | 9.9520 (12)                                                                                                               | 4.8081 (5)                                                                                               | 5.0916 (4)                                                                                                | 8.5166 (2)                                                                                               |
| <i>c</i> (Å)                                                                                                      | 13.5946(6)                                                                                         | 11.8041 (15)                                                                                                              | 20.166 (3)                                                                                               | 22.201 (2)                                                                                                | 14.7464 (3)                                                                                              |
| α (°)                                                                                                             | 90                                                                                                 | 97.589 (4)                                                                                                                | 90                                                                                                       | 90                                                                                                        | 84.878 (1)                                                                                               |
| β (°)                                                                                                             | 101.160(3)                                                                                         | 113.069 (4)                                                                                                               | 103.286 (10)                                                                                             | 106.637 (9)                                                                                               | 85.115 (1)                                                                                               |
| γ (°)                                                                                                             | 90                                                                                                 | 93.795 (4)                                                                                                                | 90                                                                                                       | 90                                                                                                        | 74.344 (1)                                                                                               |
| <i>V</i> (Å <sup>3</sup> )                                                                                        | 3923.3(3)                                                                                          | 1011.2 (2)                                                                                                                | 1354.8 (3)                                                                                               | 1491.4 (3)                                                                                                | 691.26 (2)                                                                                               |
| <i>Z</i>                                                                                                          | 8                                                                                                  | 2                                                                                                                         | 4                                                                                                        | 4                                                                                                         | 2                                                                                                        |
| Radiation type                                                                                                    | Cu <i>K</i> α                                                                                      | Mo <i>K</i> α                                                                                                             | Cu <i>K</i> α                                                                                            | Cu <i>K</i> α                                                                                             | Cu <i>K</i> α                                                                                            |
| μ (mm <sup>−1</sup> )                                                                                             | 1.78                                                                                               | 0.22                                                                                                                      | 2.21                                                                                                     | 2.06                                                                                                      | 2.19                                                                                                     |
| Crystal size (mm)                                                                                                 | 0.30 × 0.32 × 0.06                                                                                 | 0.28 × 0.24 × 0.18                                                                                                        | 0.2 × 0.08 × 0.01                                                                                        | 0.16 × 0.12 × 0.04                                                                                        | 0.3 × 0.2 × 0.08                                                                                         |
| <b>Data collection</b>                                                                                            |                                                                                                    |                                                                                                                           |                                                                                                          |                                                                                                           |                                                                                                          |
| Diffractometer                                                                                                    | Bruker AXS D8<br>VENTURE<br>PHOTON III<br>C14 IuS 3.0                                              | Bruker <i>APEX3</i><br>CCD                                                                                                | Bruker AXS D8<br>VENTURE<br>PHOTON III<br>C14 IuS 3.0                                                    | Bruker AXS D8<br>VENTURE<br>PHOTON III C14<br>IuS 3.0                                                     | Bruker AXS D8<br>VENTURE<br>PHOTON III C14<br>IuS 3.0                                                    |
| <i>T</i> <sub>min</sub> , <i>T</i> <sub>max</sub>                                                                 | 0.7533, 0.4156                                                                                     | 0.664, 0.746                                                                                                              | 0.356, 0.752                                                                                             | 0.402, 0.753                                                                                              | 0.496, 0.754                                                                                             |
| Reflns. measured                                                                                                  | 30859                                                                                              | 11729                                                                                                                     | 8414                                                                                                     | 12113                                                                                                     | 10893                                                                                                    |
| Independent reflns.                                                                                               | 7358                                                                                               | 3973                                                                                                                      | 2128                                                                                                     | 2593                                                                                                      | 2831                                                                                                     |
| observed reflns.<br>with [ <i>I</i> > 2σ( <i>I</i> )]                                                             | 5736                                                                                               | 3289                                                                                                                      | 1241                                                                                                     | 2344                                                                                                      | 2643                                                                                                     |
| <i>R</i> <sub>int</sub>                                                                                           | 0.067                                                                                              | 0.036                                                                                                                     | 0.102                                                                                                    | 0.060                                                                                                     | 0.029                                                                                                    |
| (sin θ/λ) <sub>max</sub> (Å <sup>−1</sup> )                                                                       | 0.615                                                                                              | 0.617                                                                                                                     | 0.578                                                                                                    | 0.601                                                                                                     | 0.636                                                                                                    |
| <b>Refinement</b>                                                                                                 |                                                                                                    |                                                                                                                           |                                                                                                          |                                                                                                           |                                                                                                          |
| <i>R</i> [ <i>F</i> <sup>2</sup> > 2σ( <i>F</i> <sup>2</sup> )],<br><i>wR</i> ( <i>F</i> <sup>2</sup> ), <i>S</i> | 0.075, 0.19, 0.96                                                                                  | 0.062, 0.14, 1.18                                                                                                         | 0.085, 0.208,<br>0.99                                                                                    | 0.043, 0.129,<br>0.95                                                                                     | 0.037, 0.106,<br>0.98                                                                                    |
| No. of reflections                                                                                                | 7358                                                                                               | 3973                                                                                                                      | 2128                                                                                                     | 2593                                                                                                      | 2831                                                                                                     |
| No. of parameters                                                                                                 | 537                                                                                                | 295                                                                                                                       | 172                                                                                                      | 219                                                                                                       | 210                                                                                                      |
| No. of restraints                                                                                                 | 35                                                                                                 | 0                                                                                                                         | 0                                                                                                        | 44                                                                                                        | 0                                                                                                        |
| Δ <sub>max</sub> , Δ <sub>min</sub> (e Å <sup>−3</sup> )                                                          | 0.769, -0.722                                                                                      | 0.623, -0.364                                                                                                             | 0.56, -0.38                                                                                              | 0.44, -0.27                                                                                               | 0.19, -0.37                                                                                              |

**Table S3.** Contributions of different types of non-covalent interactions into the lattice energies of studied multicomponent crystals of TDZH estimated by QTAIMC<sup>a</sup>

|                                     | [TDZH+VA]<br>(1:1) <sup>b</sup> | [TDZH+GA+<br>H <sub>2</sub> O] (1:1:2.5) | [TDZH+OxAc]<br>(2:1) | [TDZH+AdipAc]<br>(2:1) | [TDZH+FumAc]<br>(2:1) |
|-------------------------------------|---------------------------------|------------------------------------------|----------------------|------------------------|-----------------------|
| $E_{\text{latt}}$                   | 248.4                           | 477.2                                    | 238.5                | 206.7                  | 196.7                 |
| $\Sigma E$ (X-<br>H $\cdots$ X)     | 129.0<br>(51.9%)                | 330.1<br>(69.2%)                         | 137.9 (57.8%)        | 94.3 (45.6%)           | 104.5 (53.1%)         |
| $\Sigma E$<br>(C-H $\cdots$ X)      | 51.8 (20.9%)                    | 56.8 (11.9%)                             | 49.7 (20.8%)         | 59.9 (29%)             | 47.5 (24.2%)          |
| $\Sigma E$<br>(C-H $\cdots$ $\pi$ ) | 14.3 (5.8%)                     | 4.1 (0.9%)                               | 7.3 (3.1%)           | 12.2 (5.9%)            | 5.5 (2.8%)            |
| $\Sigma E$ ( $\pi\cdots\pi$ )       | 35.6 (14.3%)                    | 71.7 (15%)                               | 28 (11.8%)           | 26.2 (12.7%)           | 28.8 (14.6%)          |
| Other                               | 17.7 (7.1%)                     | 14.4 (3%)                                | 15.6 (6.5%)          | 14.2 (6.9%)            | 10.3 (5.2%)           |
| TDZH-CF                             | 200.7<br>(80.8%)                | 190.4<br>(39.9%)                         | 170.6 (71.5%)        | 119.4 (57.7%)          | 104.8 (53.3%)         |
| TDZH-<br>TDZH                       | 37.5 (15.1%)                    | 34.5 (7.2%)                              | 63.6 (26.7%)         | 77.8 (37.6%)           | 85 (43.2%)            |
| CF-CF                               | 10.2 (4.1%)                     | 20.9 (4.4%)                              | 4.3 (1.8%)           | 9.6 (4.7%)             | 6.8 (3.5%)            |
| TDZH-H <sub>2</sub> O               | —                               | 59.8 (12.5%)                             | —                    | —                      | —                     |
| CF-H <sub>2</sub> O                 | —                               | 115.0<br>(24.1%)                         | —                    | —                      | —                     |
| H <sub>2</sub> O-H <sub>2</sub> O   | —                               | 56.5 (11.8%)                             | —                    | —                      | —                     |

<sup>a</sup> All values are given in kJ·mol<sup>-1</sup> per asymmetric unit (except [TDZH+VA] (1:1), see below) and % of the  $E_{\text{latt}}$  value.

<sup>b</sup> For [TDZH+VA] (1:1), all value are given per half of the asymmetric unit (1 molecule of TDZH and 1 molecule of VA)

**Table S4.** Experimental solubility ( $S_{CC}$ ) of TDZH cocrystals at the equilibrium pH and 25.0°C, solubility advantage (SA), eutectic constants ( $K_{eu}$ ) and  $K_{sp}$  values

| Cocrystal                               | pH <sub>eq</sub> | [TDZH] <sub>eu</sub> , mol·l <sup>-1</sup> | [CF] <sub>eu</sub> , mol·l <sup>-1</sup> | $S_{cc}$ , mol·l <sup>-1</sup> |
|-----------------------------------------|------------------|--------------------------------------------|------------------------------------------|--------------------------------|
| [TDZH+VA] (1:1)                         | 2.3              | $(4.4 \pm 0.5) \cdot 10^{-3}$              | $(1.8 \pm 0.3) \cdot 10^{-3}$            | $(2.8 \pm 0.4) \cdot 10^{-3}$  |
|                                         | 3.2              | $(3.9 \pm 0.5) \cdot 10^{-3}$              | $(1.3 \pm 0.4) \cdot 10^{-3}$            | $(2.3 \pm 0.5) \cdot 10^{-3}$  |
| [TDZH+GA+H <sub>2</sub> O]<br>(1:1:2.5) | 2.2              | $(4.6 \pm 0.4) \cdot 10^{-3}$              | $(7.3 \pm 0.4) \cdot 10^{-3}$            | $(5.8 \pm 0.4) \cdot 10^{-3}$  |
|                                         | 3.2              | $(3.8 \pm 0.5) \cdot 10^{-3}$              | $(7.5 \pm 0.5) \cdot 10^{-3}$            | $(5.3 \pm 0.5) \cdot 10^{-3}$  |
| [TDZH+Fum]<br>(2:1)                     | 2.0              | $(4.6 \pm 0.5) \cdot 10^{-3}$              | $(1.8 \pm 0.3) \cdot 10^{-3}$            | $(4.3 \pm 0.5) \cdot 10^{-3}$  |
|                                         | 2.7              | $(4.0 \pm 0.6) \cdot 10^{-3}$              | $(1.5 \pm 0.4) \cdot 10^{-3}$            | $(3.7 \pm 0.6) \cdot 10^{-3}$  |
| [TDZH+Adip]<br>(2:1)                    | 2.1              | $(4.0 \pm 0.4) \cdot 10^{-3}$              | $(1.0 \pm 0.1) \cdot 10^{-2}$            | $(7.0 \pm 0.6) \cdot 10^{-3}$  |
|                                         | 4.9              | $(3.6 \pm 0.4) \cdot 10^{-3}$              | $(3.9 \pm 0.2) \cdot 10^{-2}$            | $(9.9 \pm 0.8) \cdot 10^{-3}$  |
| [TDZH+Oxal]<br>(2:1)                    | 1.2              | $(8.6 \pm 0.8) \cdot 10^{-3}$              | $(1.0 \pm 0.3) \cdot 10^{-2}$            | $(2.5 \pm 0.3) \cdot 10^{-2}$  |
